# Supplementary material for: Responsive hairpin DNA aptamer switch to program the strand displacement reaction for the enhanced electrochemical assay of ATP
Source: Royal Society of Chemistry journal article supplement (doi:10.1039/c5an00725a), 2015-01-01
Supplement: c5an00725a1.pdf [file c5an00725a1.pdf]

## Supporting information

# **Responsive hairpin DNA aptamer switch to program the strand displacement reaction for the enhanced electrochemical assay of ATP**

Li Wang, Li Fang, and Shufeng Liu\*

*Key Laboratory of Sensor Analysis of Tumor Marker, Ministry of Education, College of Chemistry and Molecular Engineering, Qingdao University of Science and Technology, Qingdao 266042, China.*

\* Corresponding author. E-mail: [sliu@qust.edu.cn](mailto:sliu@qust.edu.cn)

### **Table of contents**

|                                   |              |
|-----------------------------------|--------------|
| <b>Experimental section</b> ----- | <b>S2-S3</b> |
| <b>Table S1</b> -----             | <b>S4</b>    |
| <b>Figure S1</b> -----            | <b>S5</b>    |
| <b>Figure S2</b> -----            | <b>S6</b>    |
| <b>Figure S3</b> -----            | <b>S7</b>    |
| <b>Figure S4</b> -----            | <b>S8</b>    |
| <b>Table S2</b> -----             | <b>S9</b>    |
| <b>Table S3</b> -----             | <b>S10</b>   |
| <b>References</b> -----           | <b>S11</b>   |

## Experimental Section

**Chemicals and reagents.** Tris(2-carboxyethyl)phosphine (TCEP) and 6-Mercapto hexanol were purchased from Sigma-Aldrich (St. Louis, MO, USA). Adenosine 5'-triphosphate (ATP), guanosine 5'-triphosphate (GTP), cytidine 5'-triphosphate (CTP), uridine 5'-triphosphate (UTP) and thymidine 5'-triphosphate (TTP) were purchased from Sangon Biotech Co., Ltd. (Shanghai, China). All other chemicals used were of analytical reagent grade. The HPLC-purified oligonucleotide sequences are purchased from Sangon Biotech. Co., Ltd. (Shanghai, China) and listed in Table S1. The urine samples were obtained from healthy volunteers and filtered through a 0.2 mm membrane to remove any particulate matters.

**Apparatus.** All electrochemical measurements were carried out by using a CHI 660D electrochemical workstation (CH Instruments, Shanghai, China) at room temperature. A conventional three-electrode system was used, which comprised a gold working electrode (2 mm diameter), a platinum wire auxiliary electrode, and a Ag/AgCl reference electrode. Fluorescence measurements were performed using a Hitachi F-4600 spectrofluorimeter with a scan rate at 1200 nm/min (Tokyo, Japan). The excitation wavelength was set to 490 nm and the 24 photomultiplier voltage was 700V.

**Electrode pretreatment.** The gold electrode was cleaned by immersion in a freshly prepared piranha solution (a 3:1 v/v mixture of concentrated H<sub>2</sub>SO<sub>4</sub> and 30% H<sub>2</sub>O<sub>2</sub>) for 20 min, followed by a thoroughly rinse with ultrapure water. Then the electrode was polished on a microcloth (Shanghai Chenhua Inc., China) with 50 nm alumina slurry to obtain a mirror surface, followed by sonication in acetone and ultrapure water for 5 min each, to remove residual alumina powder. The well-polished electrode was then subjected to electrochemical pretreatment by cycling the potential between -0.2 and 1.5 V in H<sub>2</sub>SO<sub>4</sub> (0.5 M) at a scan rate of 100 mV s<sup>-1</sup> until a stable cyclic voltammogram was obtained, and then the cleaned electrode was allowed to be dried at room temperature.

**The immobilization of I-DNA and B-DNA on the electrode surface.** Each DNA solution was heated to 95 °C for 5 min and then allowed to cool to room temperature for at least 2 hr before use. The duplex DNA probe was firstly prepared by mixing the same volume of 1 μM I-DNA and 1.5 μM B-DNA in 10 mM PBS (0.2 M NaCl, 10 mM TCEP, pH 7.9). Then the electrode was incubated into above DNA duplex probe solution for 12 hr at room temperature and then thoroughly rinsed with ultrapure water and dried under a stream of nitrogen gas. The electrode was subsequently immersed in 1 mM MCH solution for 1 hour to remove the nonspecific DNA adsorption.

**ATP recognition and toehold-mediated strand displacement reaction on the electrode.** The ATP recognition and toehold-mediated strand displacement reaction was performed by incubation of the above I-DNA and B-DNA modified electrode into the 50 μL 10 mM PBS buffer (0.2 M NaCl, pH 7.9) containing 1 μM HP1 and different concentrations of ATP for 2 hr at 37 °C. Then, the electrode was rinsed with PBS buffer and ultrapure water for electrochemical measurement.

**Electrochemical measurements.** Cyclic voltammetric (CV) and differential pulse voltammetric (DPV) results were recorded in 10 mM PBS buffer (200 mM KNO<sub>3</sub>, pH 7.9). The DPV were recorded with the potential window from 0.4 V to -0.1 V, the pulse amplitude of 50 mV and the pulse period of 0.2 S. The electrochemical impedance spectra (EIS) were recorded in 1 mM [Fe(CN)<sub>6</sub>]<sup>3-/4-</sup> and 0.1 M KNO<sub>3</sub> with the frequency range from 0.1 Hz to 10 kHz. Before measurements, the electrolyte solution should be thoroughly purged with high purity nitrogen for about 20 min.

**Table S1.** Sequence of synthesized oligonucleotide probes for ATP detection

| Name         | Sequence (5' to 3')                                           |
|--------------|---------------------------------------------------------------|
| <b>I-DNA</b> | HS-(CH <sub>2</sub> ) <sub>6</sub> -TACTAGTCATGAGGAGGAAGGTA   |
| <b>B-DNA</b> | TCATGACTAGTA                                                  |
| <b>HP1-a</b> | TTCCTCCTTTACCTGGGGGAGTATTGCGGAGGAAGGTATCATGACTAGTA-Fc         |
| <b>HP1-b</b> | CCTTCCTCCTTTACCTGGGGGAGTATTGCGGAGGAAGGTATCATGACTAGTA-Fc       |
| <b>HP1-c</b> | TACCTTCCTCCTTTACCTGGGGGAGTATTGCGGAGGAAGGTATCATGACTAGTA-<br>Fc |
| <b>HP2</b>   | CCTTCCTCCTTTACCTGGGGGAGTATTGCGGAGGAAGGTATCATGACTAGTA          |
| <b>S1</b>    | FAM-TACTAGTCATGAGGAGGAAGGTA                                   |
| <b>S2</b>    | TCATGACTAGTA- Dabeyl                                          |

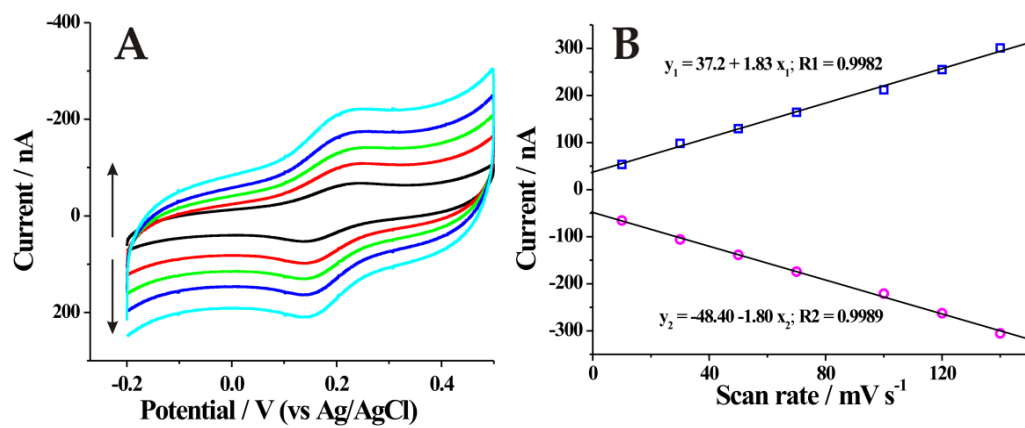

**Figure S1.** Cyclic voltammograms recorded at various scan rates of 10, 30, 50, 70 and 100 mV/s. (B) The plots of anodic and cathodic peak currents vs scan rates.

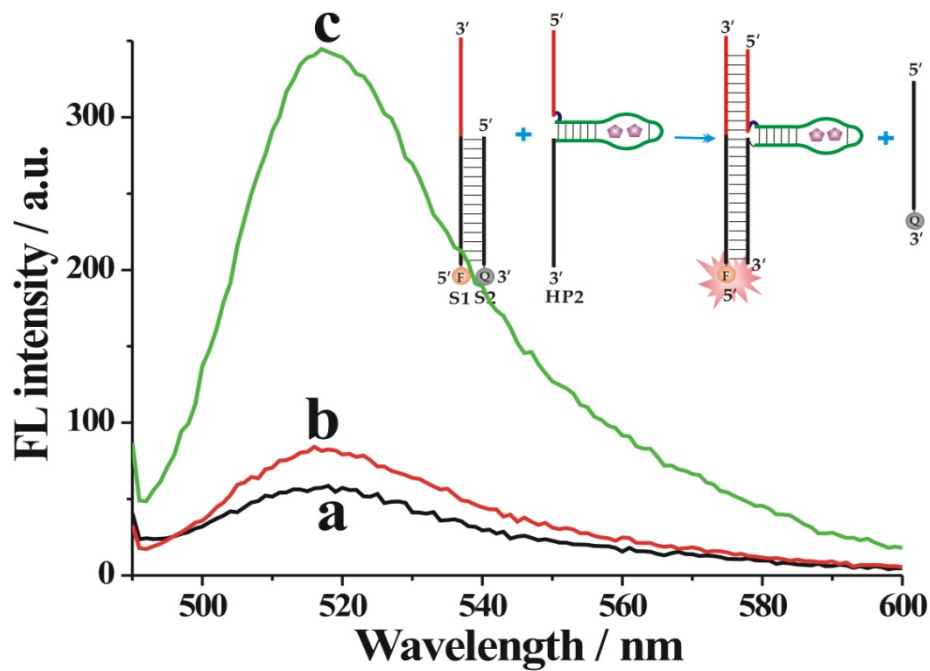

**Fig**

**re S2.** The fluorescence spectra recorded for ATP aptasensor fabrication at different conditions: (a) only the S1-S2 hybrids (S1-S2); (b) HP2 + S1-S2; (c) ATP + HP2+ S1-S2. The final concentration for ATP, HP2, S1 and S2 were 1  $\mu$ M, 200 nM, 100 nM, and 150 nM, respectively. The S1-S2 were firstly prepared with the hybridization of S1 and S2. The inset schematically demonstrates the responsive toehold-mediated strand displacement reaction for ATP detection. The strands of S1 and S2 were labeled with the fluorophore (FAM) at 5'-end and the quencher (Dabcyl) at 3'-end, respectively. The unlabeled HP2 was used for the substitute of HP1 herein.

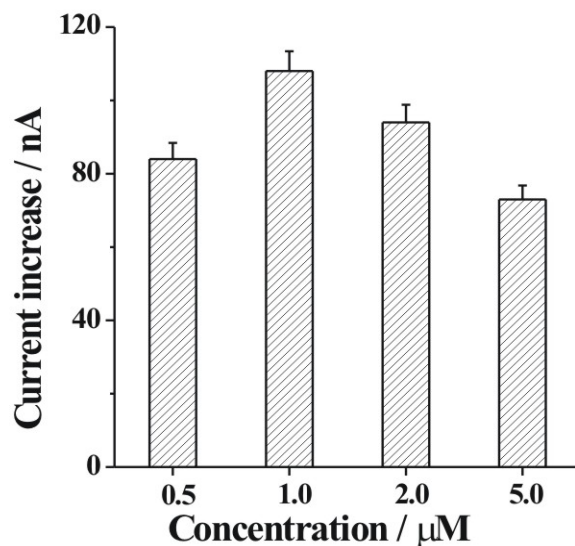

**Figure S3.** The influence of immobilization concentration of duplex DNA on the electrochemical response toward 10  $\mu\text{M}$  ATP detection. The duplex DNA was prepared with the hybridization of I-DNA and 1.5 time concentration of B-DNA. The used duplex DNA concentration corresponded to the I-DNA concentration. The current increase for y-axis indicates the electrochemical response toward 10  $\mu\text{M}$  ATP after subtracting the background value in the absence of ATP.

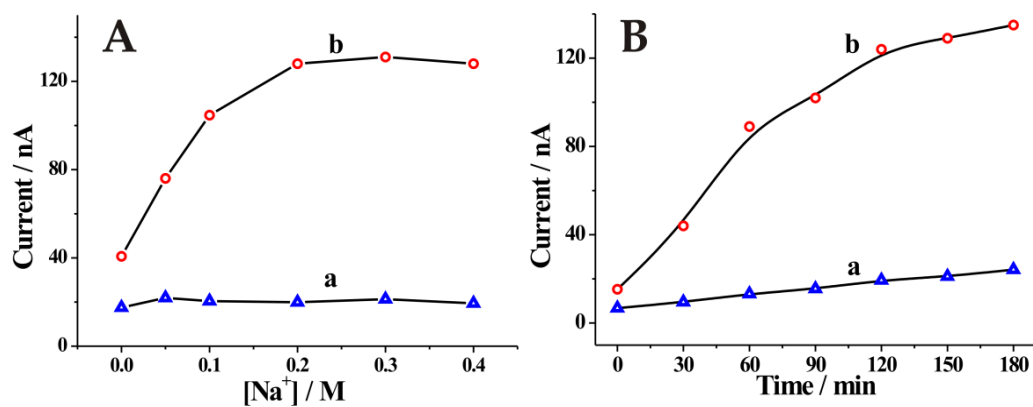

**Figure S4.** (A) Effects of the  $Na^+$  concentration plotted against DPV peak currents. The reaction mixture contains  $1 \mu M$  HP1 probe and  $10 \mu M$  ATP (b) or  $0 M$  ATP (a). (B) The time response of DPV peak current toward  $10 \mu M$  ATP (b) or  $0 M$  ATP (a).



**Table S2.** Comparison of detection performance for ATP by currently fabricated aptasensor with the reported electrochemical methods <sup>a</sup>

| Method | Detection limit        | Signal reporter                         | Ref.      |
|--------|------------------------|-----------------------------------------|-----------|
| CC     | $1.0 \times 10^{-7}$ M | RuHex                                   | [1]       |
| EIS    | $1.0 \times 10^{-8}$ M | [Fe(CN) <sub>6</sub> ] <sup>4-/3-</sup> | [2]       |
| DPV    | $1.0 \times 10^{-6}$ M | Silver nanoparticle                     | [3]       |
| DPV    | $1.0 \times 10^{-9}$ M | Fc                                      | [4]       |
| EIS    | $1.5 \times 10^{-8}$ M | [Fe(CN) <sub>6</sub> ] <sup>4-/3-</sup> | [5]       |
| SWV    | $3.0 \times 10^{-8}$ M | PbS                                     | [6]       |
| SWV    | $1.9 \times 10^{-9}$ M | Fc and MB                               | [7]       |
| ACV    | $1.0 \times 10^{-6}$ M | MB                                      | [8]       |
| DPV    | $1.0 \times 10^{-8}$ M | Fc                                      | [9]       |
| DPV    | $1.0 \times 10^{-8}$ M | Fc                                      | [10]      |
| DPV    | $5.0 \times 10^{-9}$ M | Fc                                      | This work |

<sup>a</sup> Chronocoulometry (CC); Electrochemical impedance spectroscopy (EIS); Differential pulse voltammogram (DPV); Square wave voltammogram (SWV); Alternating-current voltammogram (ACV); Ferrocene (Fc); Methylene blue (MB).

**Table S3.** Recovery experiments for the added ATP in the diluted urine sample <sup>a</sup>

| Sample | Added (nM) | Found (nM) | Recovery (%) |
|--------|------------|------------|--------------|
| 1      | 20         | 21±1.7     | 105          |
| 2      | 100        | 98±7.2     | 98           |
| 3      | 500        | 511±43     | 102          |
| 4      | 1000       | 1043±62    | 104          |

<sup>a</sup> The standard deviations for the samples were obtained from three independent experiments

## References

- [1] L. Shen, Z. Chen, Y. Li, P. Jing, S. Xie, S. He, P. He and Y. Shao, *Chem. Commun.*, 2007, 2169.
- [2] Y. Du, B. Li, H. Wei, Y. Wang and E. Wang, *Anal. Chem.*, 2008, **80**, 5110.
- [3] L. Kashefi-Kheyraadi and M. A. Mehrgardi, *Biosens. Bioelectron.*, 2012, **37**, 94.
- [4] S. Liu, Y. Wang, C. Zhang, Y. Lin and F. Li, *Chem. Commun.*, 2013, **49**, 2335.
- [5] L. Wang, M. Xu, L. Han, M. Zhou, C. Zhu, S. Dong, *Anal. Chem.*, 2012, **84**, 7301.
- [6] H. Zhang, B. Jiang, Y. Xiang, Y. Zhang, Y. Chai, R. Yuan, *Anal. Chim. Acta*, 2011, **688**, 99.
- [7] L. Wu, X. Zhang, W. Liu, E. Xiong, J. Chen, *Anal. Chem.*, 2013, **85**, 8397.
- [8] X. Zuo, Y. Xiao, K. W. Plaxco, *J. Am. Chem. Soc.*, 2009, **131**, 6944.
- [9] Y. Lu, X. Li, L. Zhang, P. Yu, L. Su, L. Mao, *Anal. Chem.*, 2008, **80**, 1883.
- [10] X. Zuo, S. Song, J. Zhang, D. Pan, L. Wang, C. Fan, *J. Am. Chem. Soc.*, 2007, **129**, 1042.
